# Supplementary material for: Design of cobalt phosphate/nickel phosphate films with improved electrochromic performance
Source: Royal Society of Chemistry journal article supplement (doi:10.1039/d4tc01221f), 2024-01-01
Supplement: d4tc01221f1.pdf [file d4tc01221f1.pdf]

## Supporting Information

# Design of Cobalt Phosphate/Nickel phosphate Film with Improved Electrochromic Performance

Xiaotong Chi, Dairong Chen, Ting Wang\* and Xiuling Jiao \*

National Engineering Research Center for Colloidal Materials School of Chemistry

and Chemical Engineering, Shandong University, Jinan 250100, P. R.

E-mail: t54wang@sdu.edu.cn, jiaoxl@sdu.edu.cn

### Supplementary Table

Table S1. EC properties of the NiO films with porous nanostructures.

| materials                              | optical modulation | coloration efficiency (cm <sup>2</sup> C <sup>-1</sup> ) | switching time tc/tb | cycle stability | reference |
|----------------------------------------|--------------------|----------------------------------------------------------|----------------------|-----------------|-----------|
| NiO                                    | 78.5% at 550nm     | 51.8                                                     | 3.92s / 3.43s        | 1000            | [1]       |
| NiO                                    | 51% at 550nm       | 40                                                       | 7s / 5s              | 3000            | [2]       |
| NiCoO <sub>2</sub>                     | 64.2% at 550nm     | 33.6                                                     | 6.8 / 6.7s           | 200             | [3]       |
| NiHCF                                  | 17.5% at 400nm     | /                                                        | 21.5min / 8.5s       | 55              | [4]       |
| Li-Ti-NiO                              | 56% at 580nm       | 21.8                                                     | 0.9s / 1.0s          | 300             | [5]       |
| Sn-NiO                                 | 65.1% at 550nm     | 39.3                                                     | 1.3s / 1.4s          | 500             | [6]       |
| rGO-NiO                                | 53% at 630nm       | 30.5                                                     | 3.4s / 5.3s          | 1000            | [7]       |
| OL-NiO                                 | 54.27% at 450nm    | 48.5                                                     | 3.2s / 2.7s          | /               | [8]       |
| NiHPO <sub>4</sub>                     | 90.8% at 500nm     | 75.4                                                     | 7.1/9.6              | 300             | [9]       |
| CoHPO <sub>4</sub> /NiHPO <sub>4</sub> | 65.55% at 500nm    | 140.37                                                   | 2.0/8.5              | 1400            | This work |

**Table S2.** Anode and cathode peak current density vs (scan rate)<sup>1/2</sup> plot obtained from CV curves, corresponding linear fits of the CoHP/NiHP-1 film, CoHP/NiHP-2 film, CoHP/NiHP-3 film, CoHP/NiHP-4 film, CoHP/NiHP-5 film CoHP/NiHP-6 film.

|                              | CoHP/NiHP-1 film                                              | CoHP/NiHP-2 film                                               | CoHP/NiHP-3 film                                             | CoHP/NiHP-4 film                                             | CoHP/NiHP-5 film                                              | CoHP/NiHP-6 film                                              |
|------------------------------|---------------------------------------------------------------|----------------------------------------------------------------|--------------------------------------------------------------|--------------------------------------------------------------|---------------------------------------------------------------|---------------------------------------------------------------|
| <b>Oxidative linear fits</b> | $I = -0.456 + 0.77 \times v^{1/2}$<br>R <sup>2</sup> =0.99952 | $I = -1.1818 + 1.28 \times v^{1/2}$<br>R <sup>2</sup> =0.99985 | $I = -1.15 + 1.49 \times v^{1/2}$<br>R <sup>2</sup> =0.99913 | $I = -0.48 + 1.64 \times v^{1/2}$<br>R <sup>2</sup> =0.99981 | $I = 0.252 + 1.59 \times v^{1/2}$<br>R <sup>2</sup> =0.99942  | $I = 0.756 + 1.52 \times v^{1/2}$<br>R <sup>2</sup> =0.99945  |
| <b>Reductive linear fits</b> | $I = 0.392 - 0.66 \times v^{1/2}$<br>R <sup>2</sup> =0.99976  | $I = -0.925 - 1.04 \times v^{1/2}$<br>R <sup>2</sup> =0.99967  | $I = 1.03 - 1.23 \times v^{1/2}$<br>R <sup>2</sup> =0.99917  | $I = 0.45 - 1.28 \times v^{1/2}$<br>R <sup>2</sup> =0.99972  | $I = -0.018 - 1.23 \times v^{1/2}$<br>R <sup>2</sup> =0.99911 | $I = -0.796 - 1.19 \times v^{1/2}$<br>R <sup>2</sup> =0.99942 |

**Table S3.** Anode and cathode peak current density vs (scan rate)<sup>1/2</sup> plot obtained from CV curves, corresponding linear fits and diffusion coefficient of the CoHP film, NiHP film and CoHPO<sub>4</sub>/NiHPO<sub>4</sub> film (CoHP/NiHP-4 film).

|                              | CoHP film                                                    | NiHP film                                                    | CoHP/NiHP-4 film                                             |
|------------------------------|--------------------------------------------------------------|--------------------------------------------------------------|--------------------------------------------------------------|
| <b>Oxidative linear fits</b> | $I = -2.31 + 1.37 \times v^{1/2}$<br>R <sup>2</sup> =0.99904 | $I = -1.05 + 1.49 \times v^{1/2}$<br>R <sup>2</sup> =0.99979 | $I = -0.48 + 1.64 \times v^{1/2}$<br>R <sup>2</sup> =0.99981 |
| <b>Reductive linear fits</b> | $I = 1.85 - 1.25 \times v^{1/2}$<br>R <sup>2</sup> =0.99937  | $I = -0.51 - 1.08 \times v^{1/2}$<br>R <sup>2</sup> =0.99935 | $I = 0.45 - 1.28 \times v^{1/2}$<br>R <sup>2</sup> =0.99972  |

**Table S4.** The transmittance of initial state, bleached state and color state of the CoHP/NiHP-1 film, CoHP/NiHP-2 film, CoHP/NiHP-3 film, CoHP/NiHP-4 film, CoHP/NiHP-5 film CoHP/NiHP-6 film.

|                             | CoHP/NiHP-1 film | CoHP/NiHP-2 film | CoHP/NiHP-3 film | CoHP/NiHP-4 film | CoHP/NiHP-5 film | CoHP/NiHP-6 film |
|-----------------------------|------------------|------------------|------------------|------------------|------------------|------------------|
| <b>T<sub>initial</sub></b>  | 94.86%           | 93.90%           | 91.45%           | 89.53%           | 88.72%           | 88.13%           |
| <b>T<sub>bleached</sub></b> | 88.25%           | 87.62%           | 87.33%           | 87.03%           | 85.94%           | 85.39%           |
| <b>T<sub>colored</sub></b>  | 63.25%           | 42.57%           | 28.99%           | 21.48%           | 20.09%           | 19.15%           |
| <b>ΔT</b>                   | 25.00%           | 45.05%           | 58.34%           | 65.55%           | 65.85%           | 66.24%           |

## Supplementary Figures

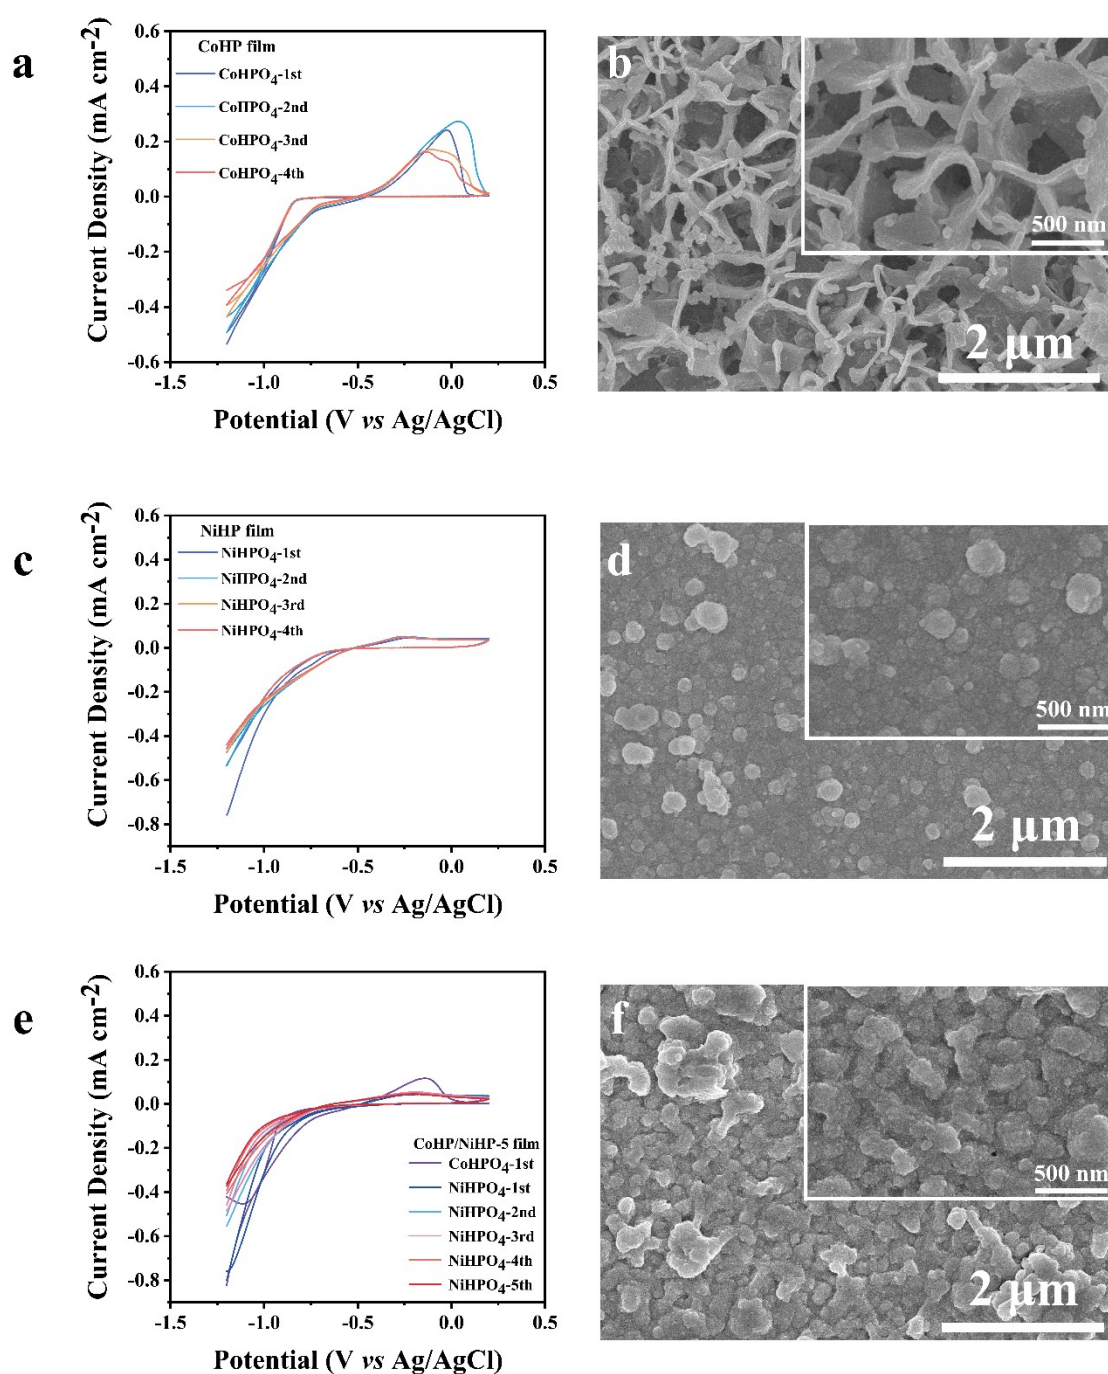

**Fig. S1** The two-step electrochemical deposition CV curves while prepared (between -1.2 and 0.2 V vs. Ag/AgCl,  $20 \text{ mV s}^{-1}$ ) and corresponding top-view SEM images of (a-b) CoHP film, (c-d) NiHP film and (e-f) CoHP/NiHP-5 film.

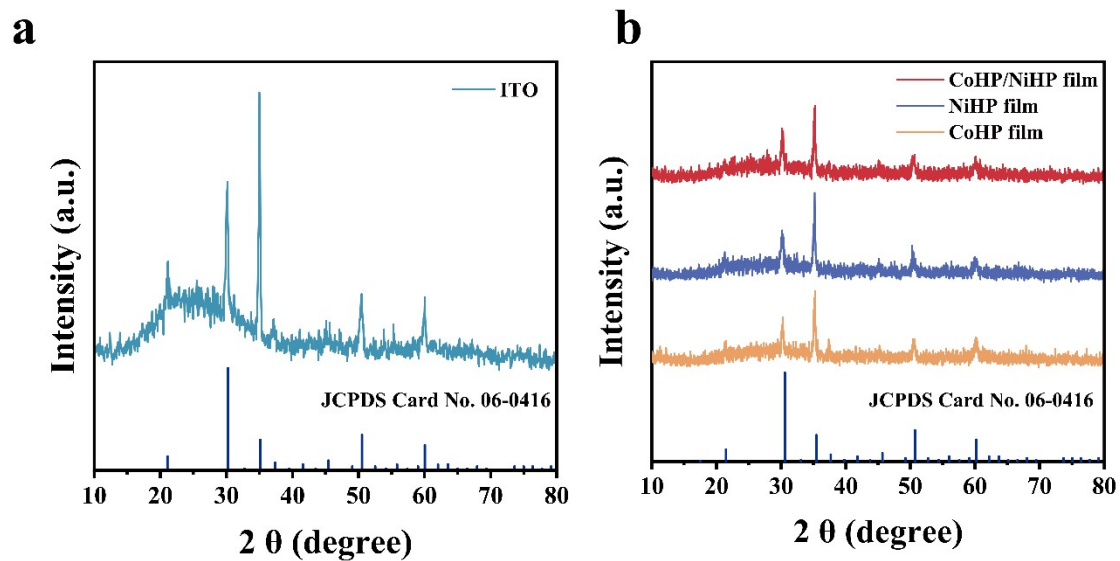

**Fig. S2** XRD patterns of (a) purchased clean ITO glass and (b) CoHP film, NiHP film and CoHP/NiHP film.

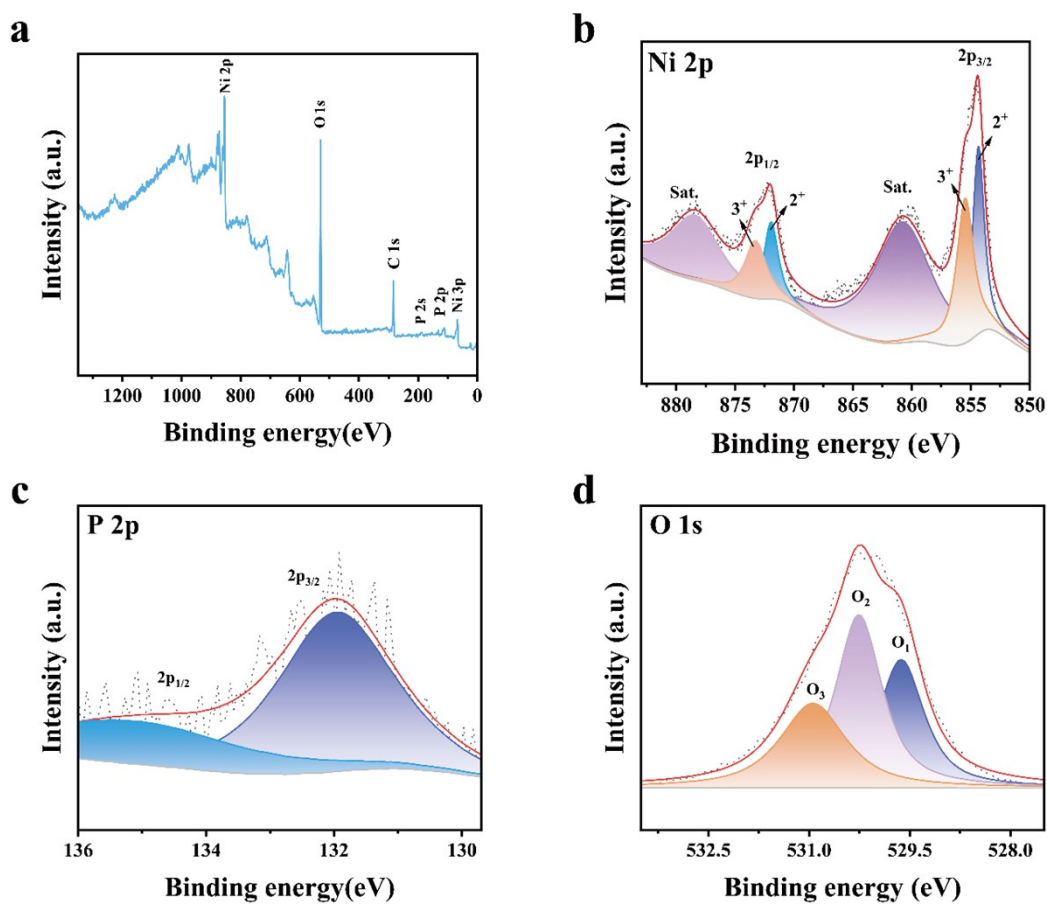

**Fig. S3** (a) XPS spectrum of the NiHP film, (b-d) Ni 2p, O 1s and P 2p spectrum of the NiHP film.

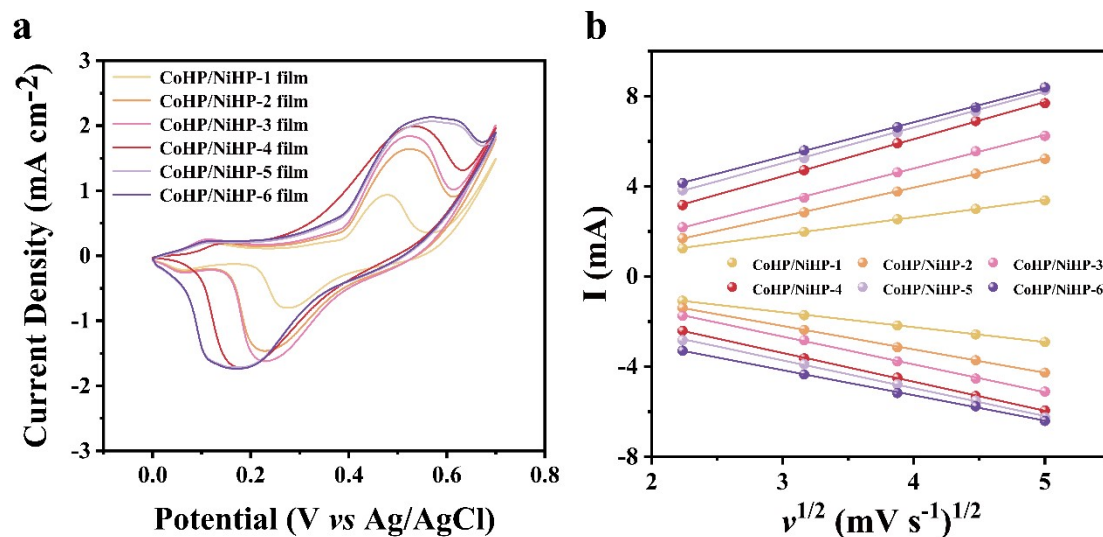

**Fig. S4** (a) CV curve comparison between CoHP/NiHP-1 film, CoHP/NiHP-2 film, CoHP/NiHP-3 film, CoHP/NiHP-4 film, CoHP/NiHP-5 film CoHP/NiHP-6 film at the scan rate of 20 mV s<sup>-1</sup>, (b) Anode and cathode peak current density vs (scan rate)<sup>1/2</sup> plot obtained from CV curves and corresponding linear fits of the CoHP/NiHP-1 film, CoHP/NiHP-2 film, CoHP/NiHP-3 film, CoHP/NiHP-4 film, CoHP/NiHP-5 film CoHP/NiHP-6 film.

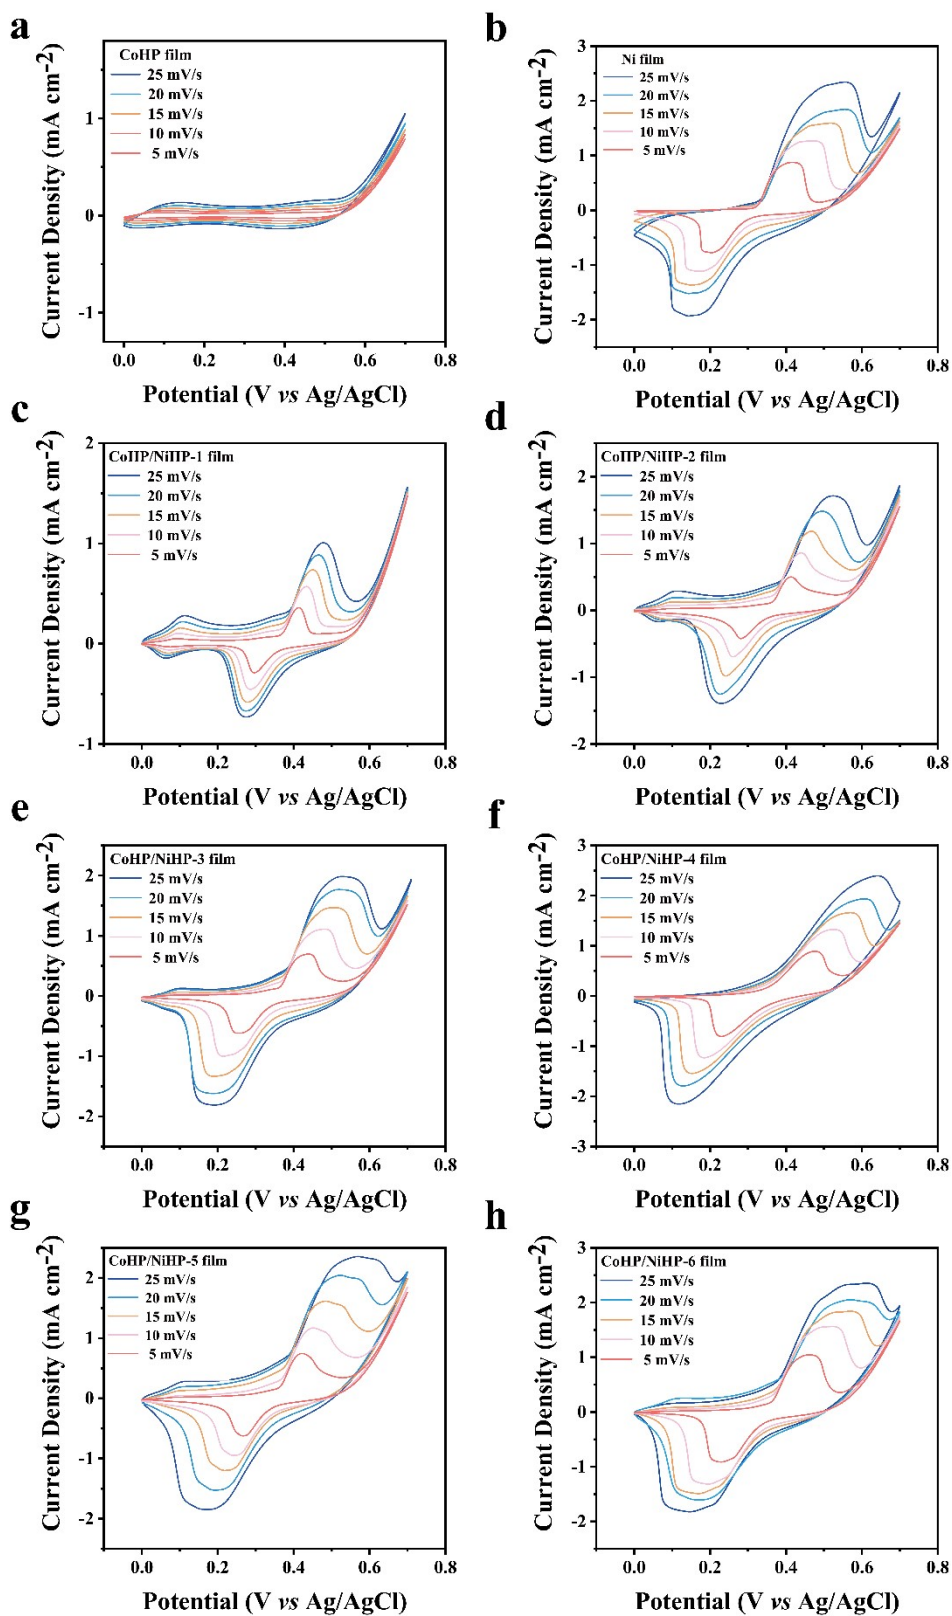

**Fig. S5** CV curves of (a) CoHP film, (b) NiHP film (c) CoHP/NiHP-1 film,(d) CoHP/NiHP-2 film,(e) CoHP/NiHP-3 film,(f) CoHP/NiHP-4 film, (g)CoHP/NiHP-5 film and (h) CoHP/NiHP-6 film at various scan rates from  $5 \text{ mV s}^{-1}$  to  $25 \text{ mV s}^{-1}$ .

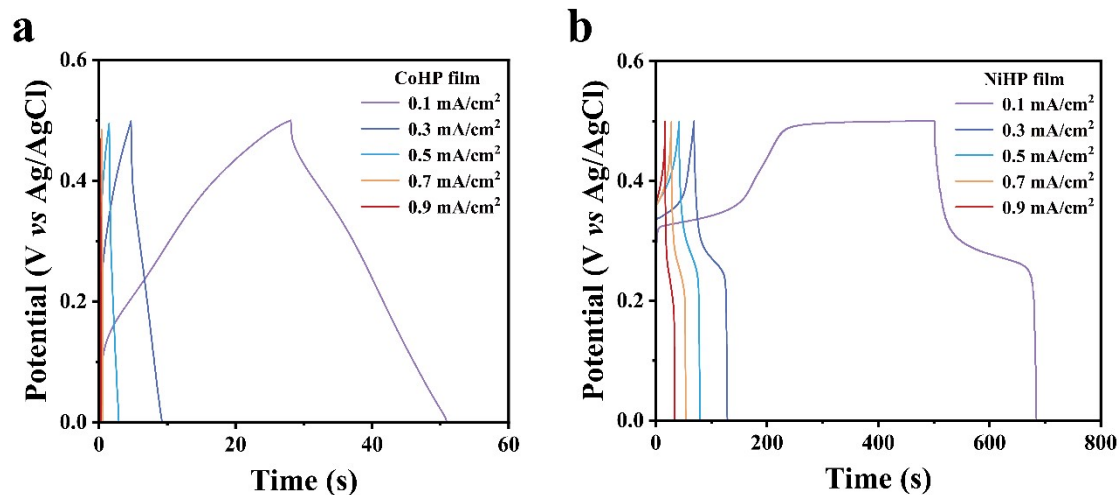

Fig. S6 GCD curves of (a) CoHP film and (b) NiHP film in 0.1 M KOH under multiple discharging current densities.

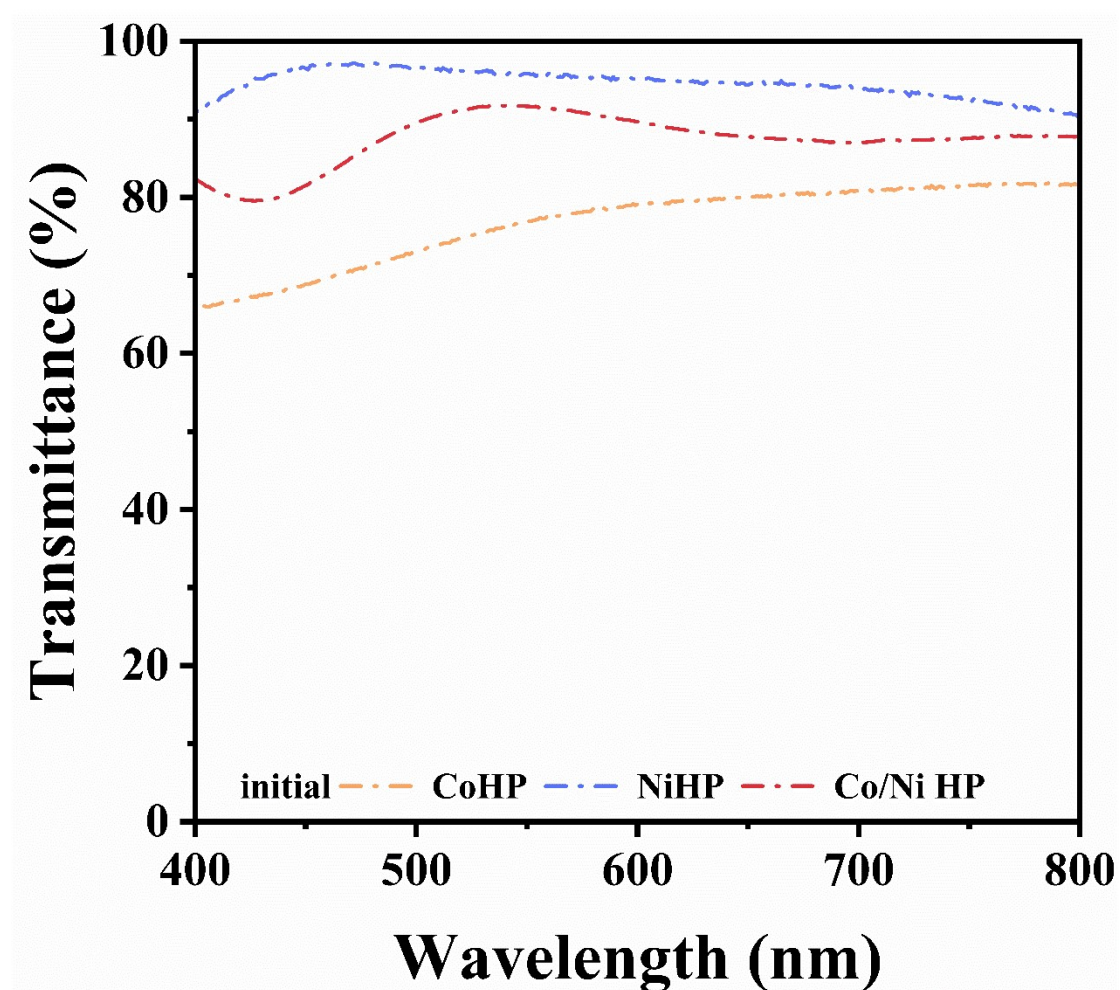

Fig. S7 Initial state of CoHP film, NiHP film and CoHP/NiHP film.



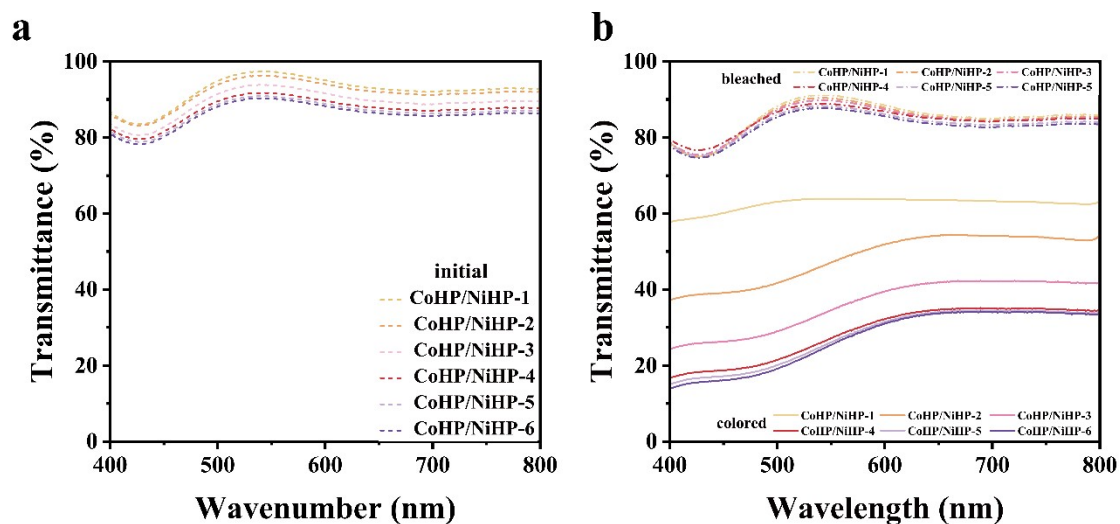

Fig. S8 (a) The initial state transmittance and (b) the bleached state and the colored state of CoHP/NiHP film with different numbers of electrodeposited CV cycles.

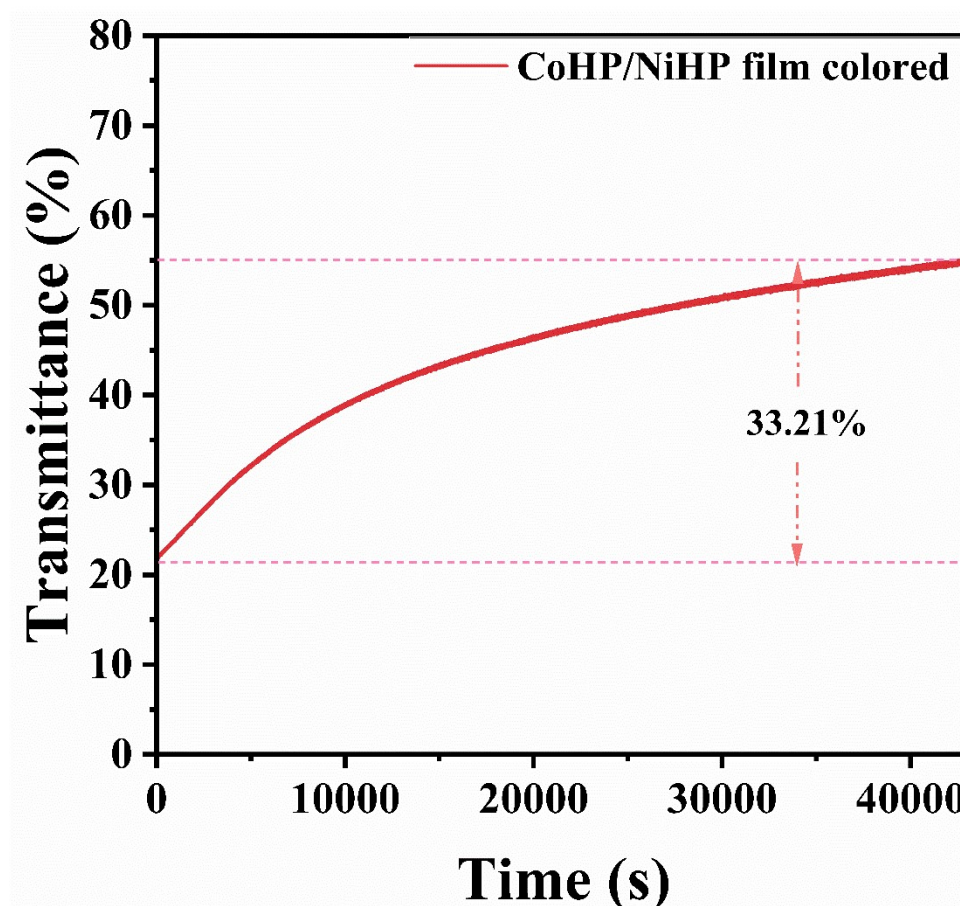

Fig. S9 Optical memory at 500 nm of the CoHP/NiHP film at stimulation voltages of 0.7 V (vs. Ag/AgCl) for 60 s, power off for 43200 s.

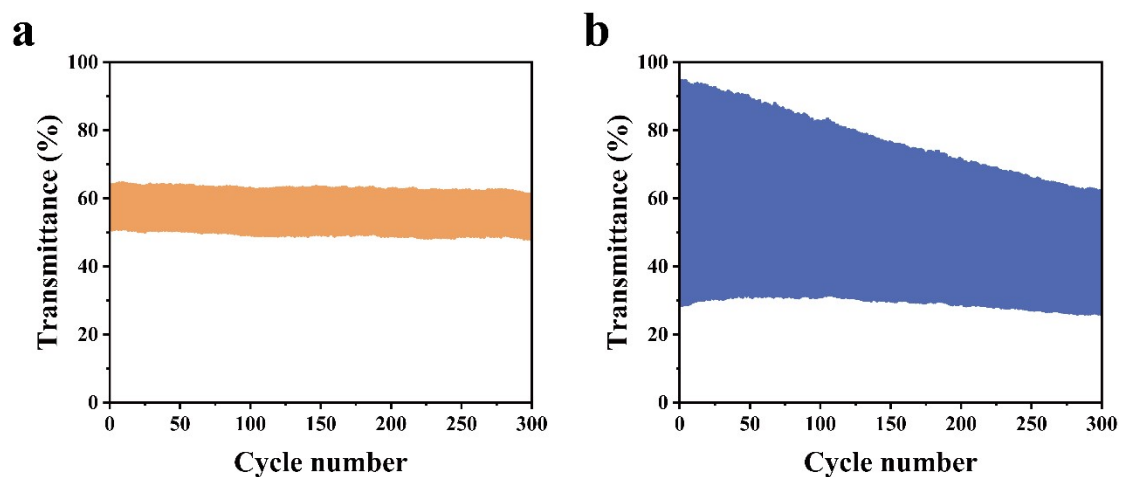

**Fig. S10** 300 cycles cyclic stability measurement of (a) CoHP film and (b) NiHP film at 500 nm by chronoamperometry and in-situ spectroscopic response.

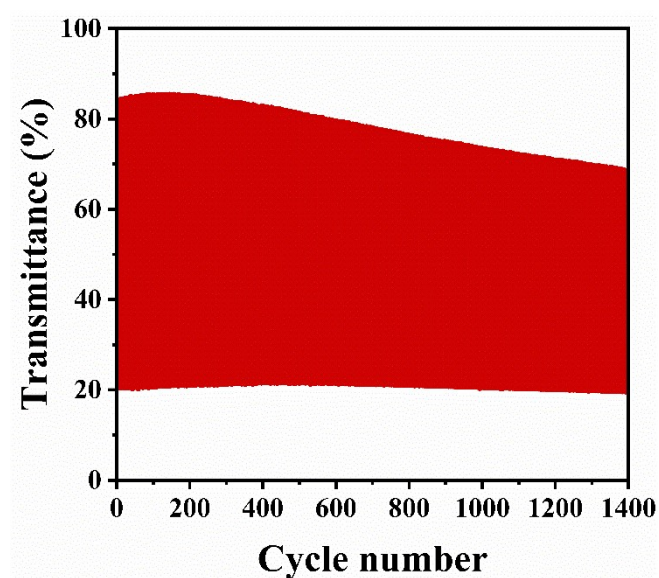

**Fig. S11** 1400 cycles cyclic stability measurement of CoHP/NiHP film at 500 nm by chronoamperometry and in-situ spectroscopic response.

#### Reference:

1. Y. Tian, Z. Li, S. Dou, X. Zhang, J. Zhang, L. Zhang, L. Wang, X. Zhao and Y. Li, *Surf. Coat. Technol.*, 2018, 337, 63-67.
2. Y. Ren, X. Zhou, H. Zhang, L. Lei and G. Zhao, *J. Mater. Chem. C*, 2018, 6, 4952-4958.
3. P. Lei, J. Wang, P. Zhang, S. Liu, S. Zhang, Y. Gao, J. Tu and G. Cai, *J. Mater. Chem. C*, 2021, 9, 14378-14387.
4. W. Xue, Y. Zhang, F. Liu, Y. Dou, M. Yan and W. Wang, *Research*, 2023, 6, 0227.

5. J. Zhou, G. Luo, Y. Wei, J. Zheng and C. Xu, *Electrochim. Acta*, 2015, 186, 182-191.
6. Y. Zhao, X. Zhang, X. Chen, W. Li, L. Wang, Z. Li, J. Zhao, F. Endres and Y. Li, *Electrochim. Acta*, 2021, 367, 137457.
7. J. Xue, H. Xu, S. Wang, T. Hao, Y. Yang, X. Zhang, Y. Song, Y. Li and J. Zhao, *Appl. Surf. Sci.*, 2021, 565, 150512.
8. K.-H. Kim, S.-J. Jeong, B.-R. Koo and H.-J. Ahn, *Appl. Surf. Sci.*, 2021, 537, 147902.
9. P. Lei, J. Wang, Y. Gao, C. Hu, S. Zhang, X. Tong, Z. Wang, Y. Gao and G. Cai, *Nano-Micro Lett.*, 2023, 15, 34.
